# Supplementary material for: Enhanced Photocatalytic Dehalogenation Performance of RuDoped In2O3 Nanoparticles Induced by Oxygen Vacancy
Source: MDPI journal article supplement (doi:10.3390/photochem3030022), 2023-09-01
Supplement: s1 [file s1]

## Electronic Supplementary Information

# Enhanced Photocatalytic Dehalogenation Performance of RuDoped In<sub>2</sub>O<sub>3</sub> Nanoparticles Induced by Oxygen Vacancy

Jingjing Xiang <sup>1,†</sup>, Jinting Shang <sup>2,†</sup> and Zhen Wan <sup>1,\*</sup>

<sup>1</sup> Key Laboratory of Catalysis and Materials Science of the State Ethnic Affairs Commission and Ministry of Education, College of Resources and Environmental Science, South-Central Minzu University, Wuhan 430074, China; xiangjingjing1124@163.com

<sup>2</sup> Wuhan Institute of Biomedical Sciences, School of Medicine, Jiangnan University, Wuhan 430056, China; shangjinting@jhu.edu.cn

\* Correspondence: 2018030@scuec.edu.cn; Tel.: +86-27-67843990

† These authors contributed equally to the this work.

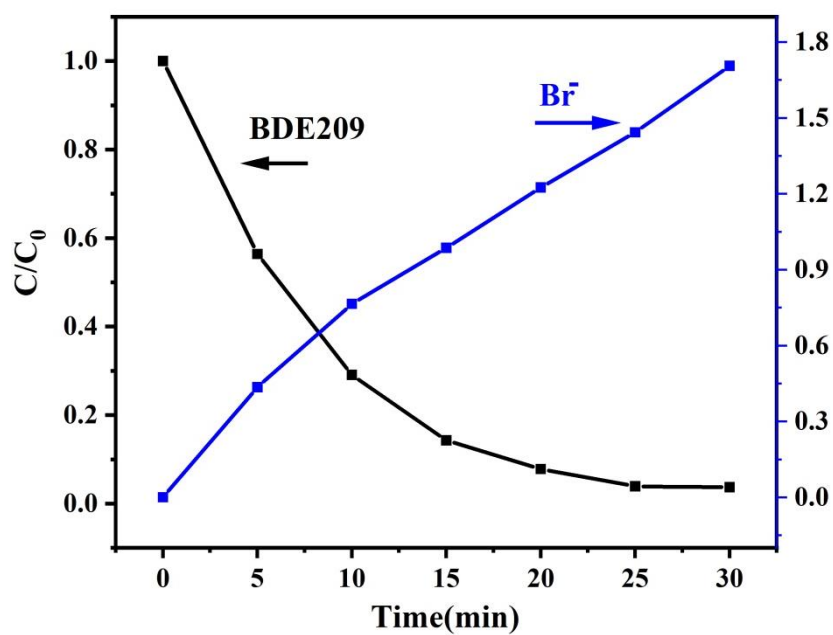

**Figure S1** The formation of bromide ion in the photocatalytic dehalogenation of Deca-BDE over the 0.5% Ru-In<sub>2</sub>O<sub>3</sub> samples.

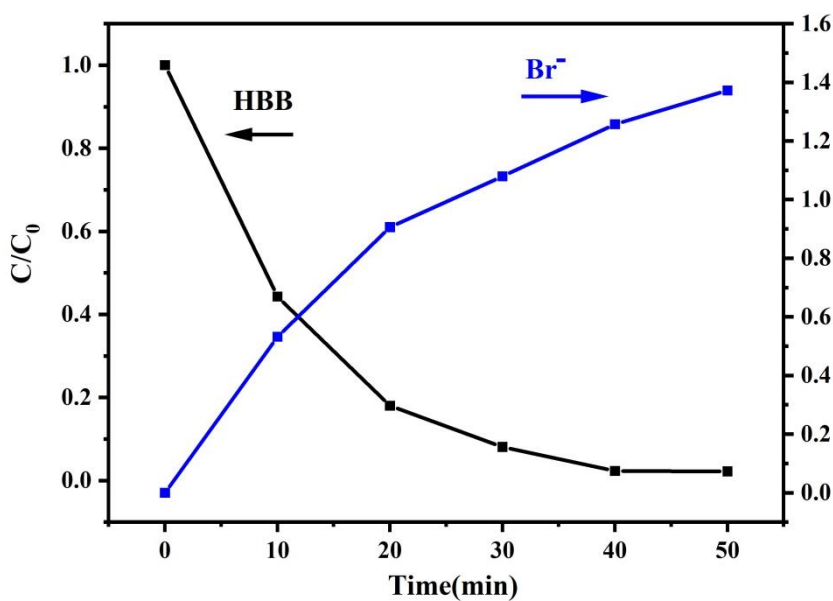

**Figure S2** The formation of bromide ion in the photocatalytic dehalogenation of Deca-BDE over the 0.5% Ru-In<sub>2</sub>O<sub>3</sub> samples.

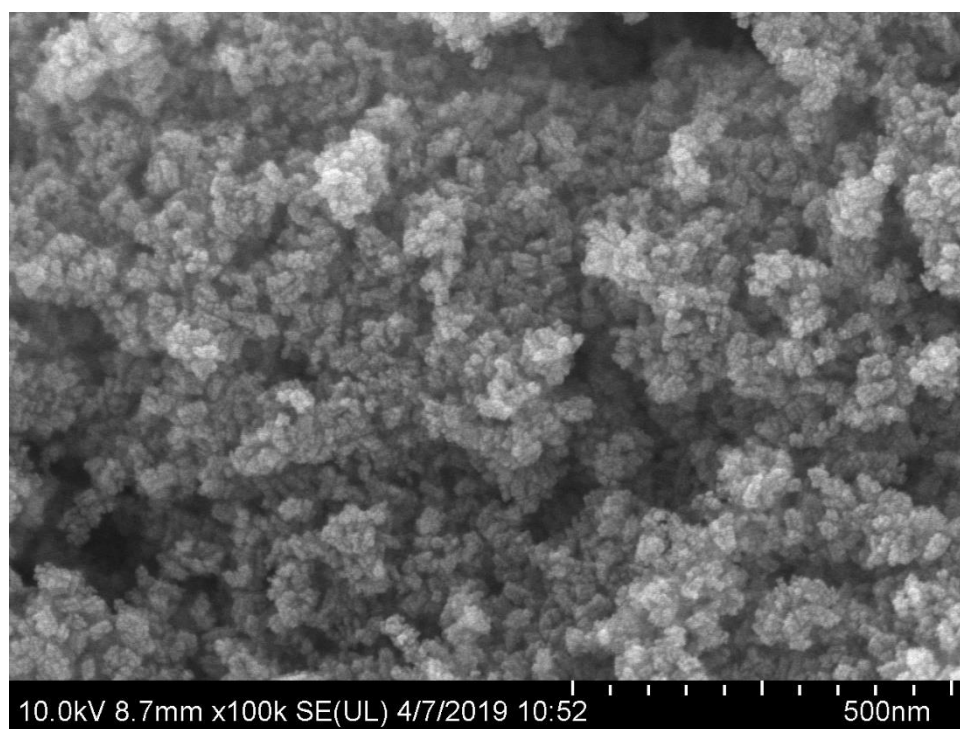

**Figure S3** SEM image of the 0% Ru-In<sub>2</sub>O<sub>3</sub> samples.

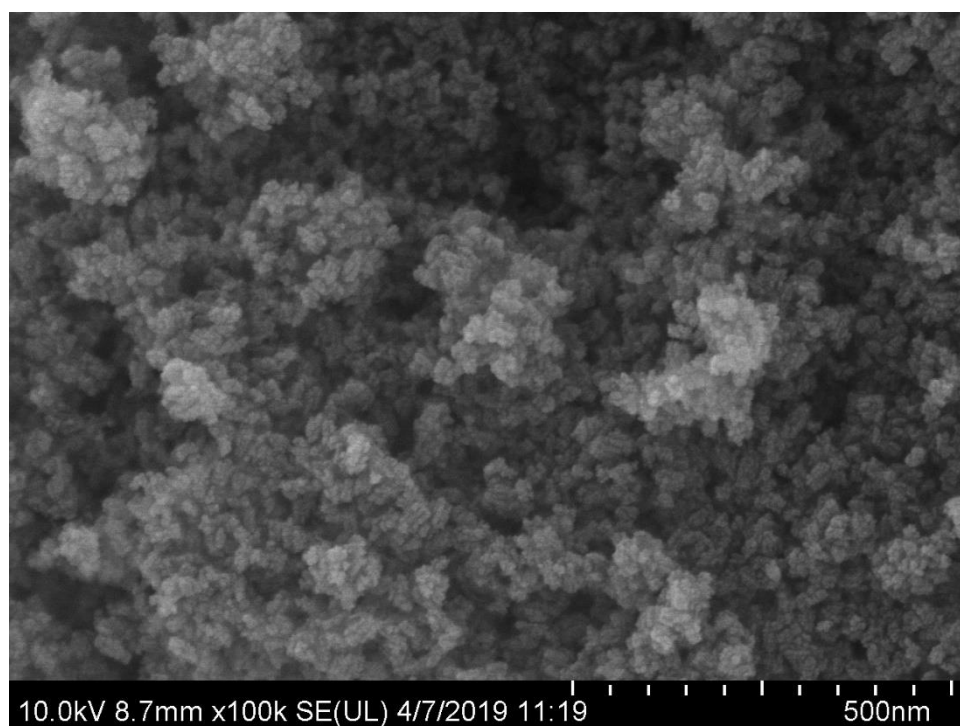

**Figure S4** SEM image of the 0.5% Ru-In<sub>2</sub>O<sub>3</sub> samples.

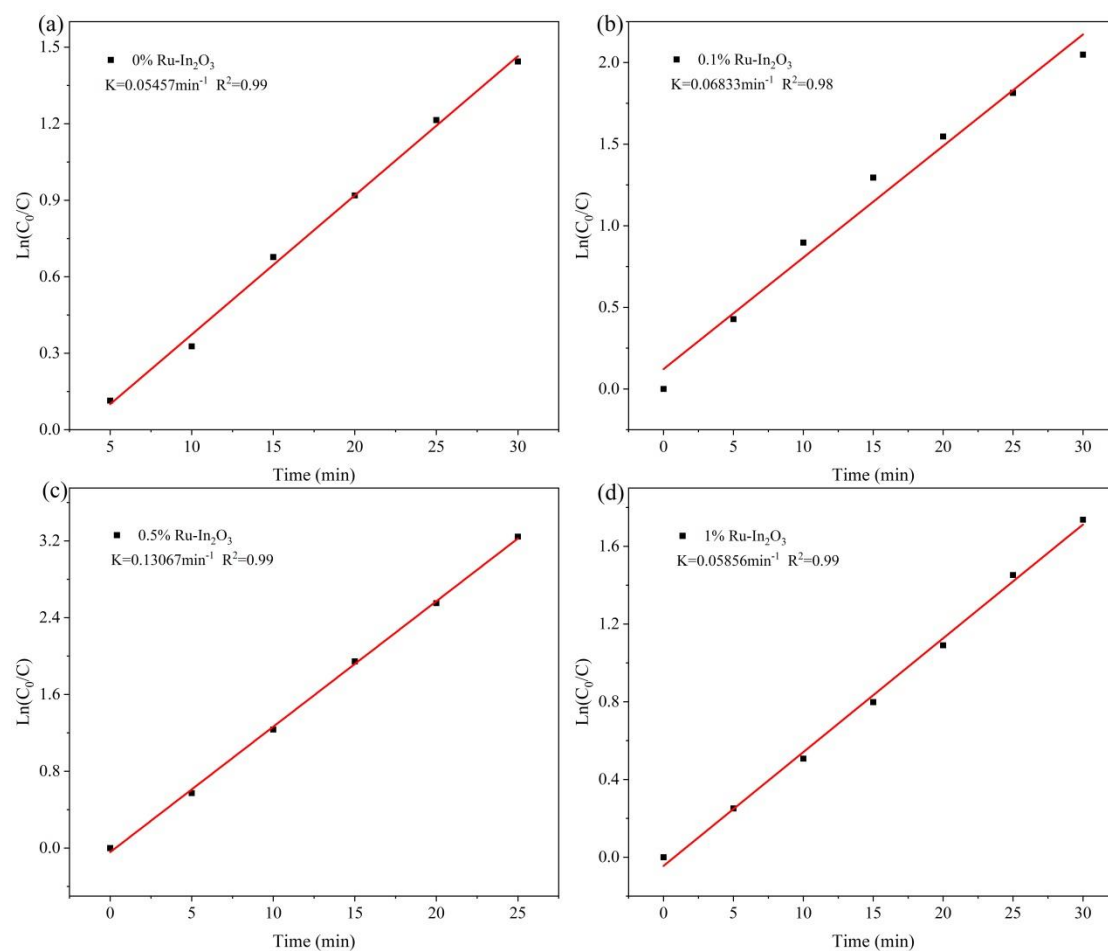

**Figure S5** Kinetic studies for the degradation of Deca-BDE over the different Ru-In<sub>2</sub>O<sub>3</sub> samples (a-d).

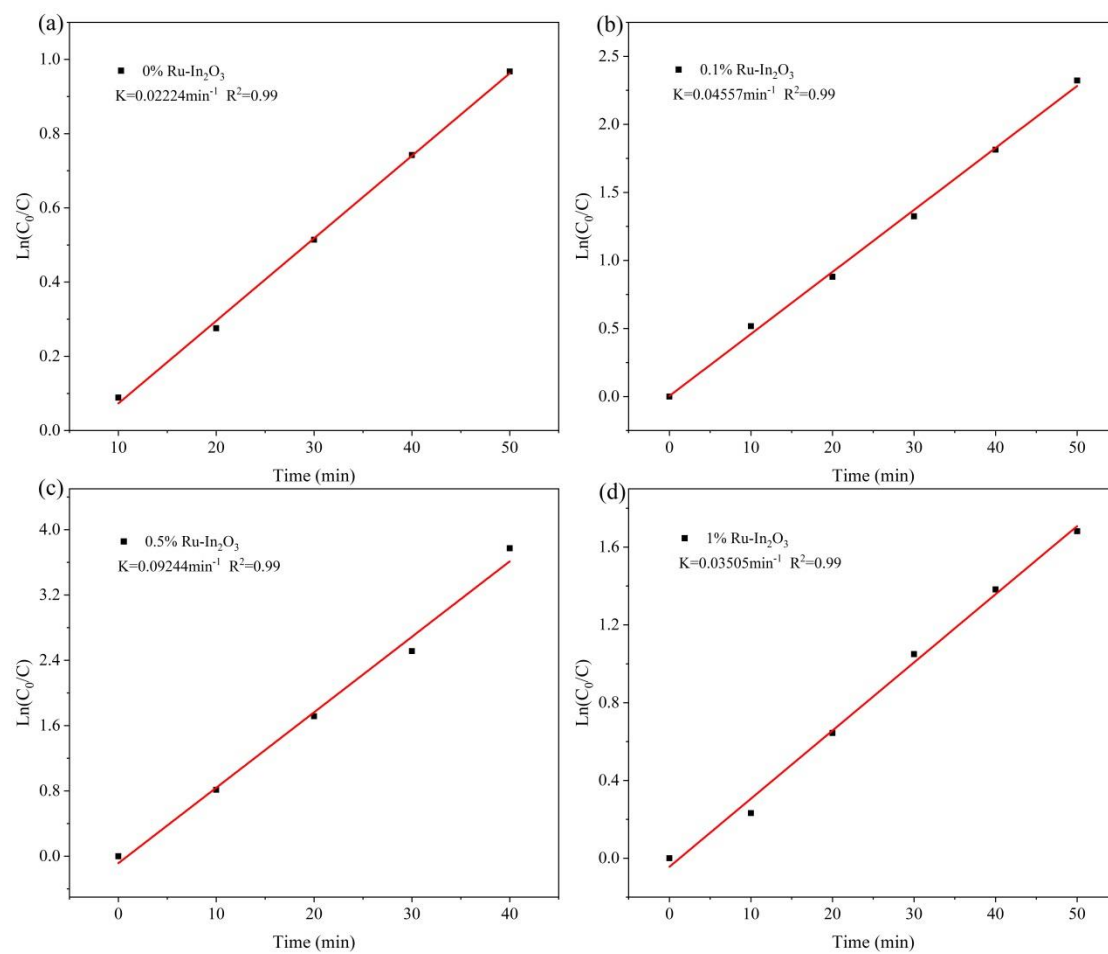

**Figure S6** Kinetic studies for the degradation of HBB over the different Ru-In<sub>2</sub>O<sub>3</sub> samples (a-d).

**Table S1** The comparison of the photocatalytic performances with other literature.

| Entry | Control Conditions                                                                                                                                 | Conversion<br>Yield % | References |
|-------|----------------------------------------------------------------------------------------------------------------------------------------------------|-----------------------|------------|
| 1     | TiO <sub>2</sub> , Xe lamp irradiation ( $\lambda > 360$ nm), methanol as solvent, Time: 25 min, Dosage: 0.2 g/L                                   | ~12%                  | [40]       |
| 2     | Cu/TiO <sub>2</sub> , Xe lamp irradiation ( $\lambda > 360$ nm), methanol as solvent, Time: 25 min, Dosage: 0.2 g/L                                | ~90%                  | [40]       |
| 3     | Ammonium-based In <sub>2</sub> O <sub>3</sub> , Xe lamp irradiation ( $\lambda > 300$ nm), methanol as solvent, Time: 100 min, Dosage: 0.33 g/L    | ~90%                  | [41]       |
| 4     | Bicarbonate-based In <sub>2</sub> O <sub>3</sub> , Xe lamp irradiation ( $\lambda > 300$ nm), methanol as solvent, Time: 100 min, Dosage: 0.33 g/L | ~45%                  | [41]       |
| 5     | Urea-based In <sub>2</sub> O <sub>3</sub> , Xe lamp irradiation ( $\lambda > 300$ nm), methanol as solvent, Time: 100 min, Dosage: 0.33 g/L        | ~35%                  | [41]       |
| 6     | Hydroxide-based In <sub>2</sub> O <sub>3</sub> , Xe lamp irradiation ( $\lambda > 300$ nm), methanol as solvent, Time: 100 min, Dosage: 0.33 g/L   | ~17%                  | [41]       |
| 7     | g-C <sub>3</sub> N <sub>4</sub> , Xe lamp irradiation ( $\lambda > 360$ nm), methanol as solvent, Time: 60 min, Dosage: 1 g/L                      | ~95%                  | [42]       |
| 8     | Ru-In <sub>2</sub> O <sub>3</sub> , Xe lamp irradiation ( $\lambda > 400$ nm), methanol as solvent, Time: 25 min, Dosage: 0.75 g/L                 | 97%                   | This work  |
